# Supplementary material
Source: Springer Nature journal article supplement (https://www.springermedizin.de/resource/supplementary/12889_2009_1987_MOESM1_ESM.pdf/9486992)
Supplement: MOESM1 [file 9486992]

**Panel A (Klamath County)**

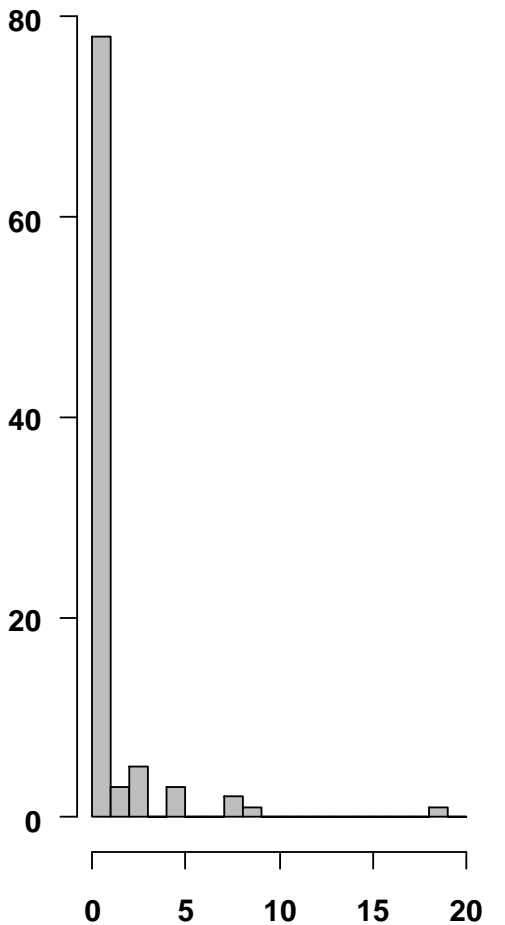

**Number of teeth with any decay**

**Panel B (Comparison Counties)**

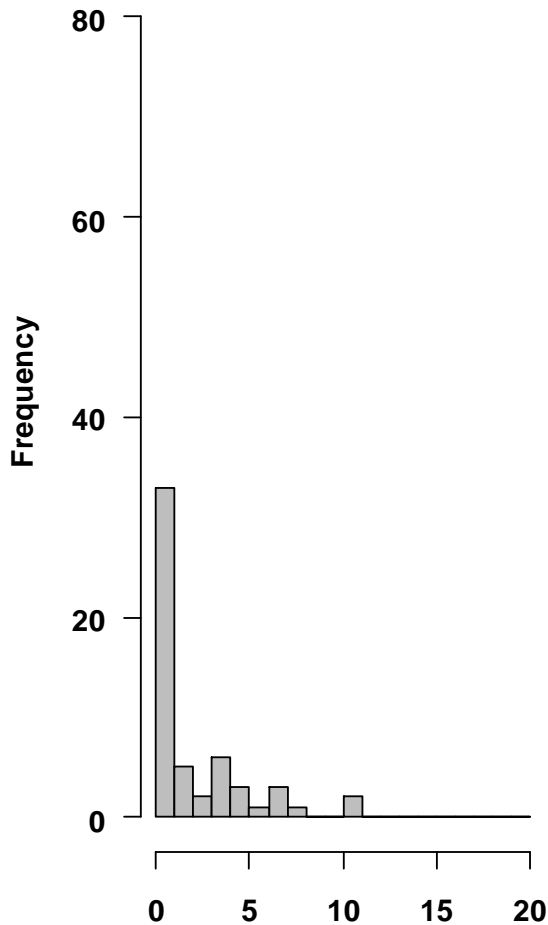

**Frequency**

**Number of teeth with any decay**
